# Supplementary material for: Palaeo plant diversity in subtropical Africa – ecological assessment of a conceptual model of climate–vegetation interaction
Source: Copernicus journal article supplement (doi:10.5194/cp-11-1361-2015), 2015-10-14
Supplement: Supplementary file 5 [file cp-11-1361-2015-supplement.zip]

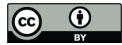

## *Supplement of*

# **Palaeo plant diversity in subtropical Africa – ecological assessment of a conceptual model of climate–vegetation interaction**

**V. P. Groner et al.**

*Correspondence to:* V. P. Groner ([vivienne.groner@mpimet.mpg.de](mailto:vivienne.groner@mpimet.mpg.de))

- [cp-11-1361-2015-supplement-title-page.pdf](#)
- [cp-2015-81-discussions-fA01.pdf](#)
- [cp-2015-81-discussions-fA02.pdf](#)
- [cp-2015-81-discussions-fA03.pdf](#)
- [cp-2015-81-discussions-fA04.pdf](#)
- [cp-2015-81-discussions-fA05.pdf](#)
- [cp-2015-81-discussions-fA06.pdf](#)
- [cp-2015-81-supplement.pdf](#)

The copyright of individual parts of the supplement might differ from the CC-BY 3.0 licence.
