# Supplementary material for: Palaeo plant diversity in subtropical Africa – ecological assessment of a conceptual model of climate–vegetation interaction
Source: Copernicus journal article supplement (doi:10.5194/cp-11-1361-2015), 2015-10-14

Four AHP plant types interacting individually with climate

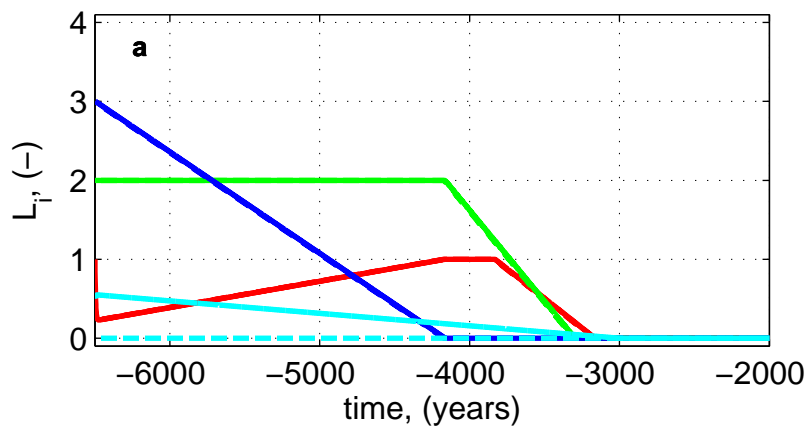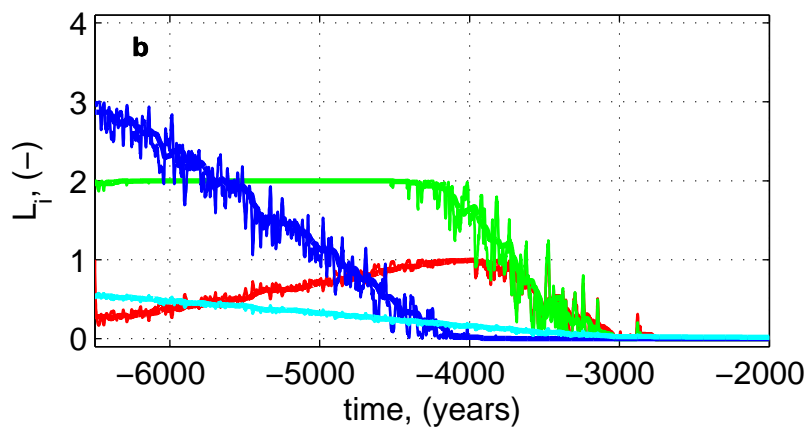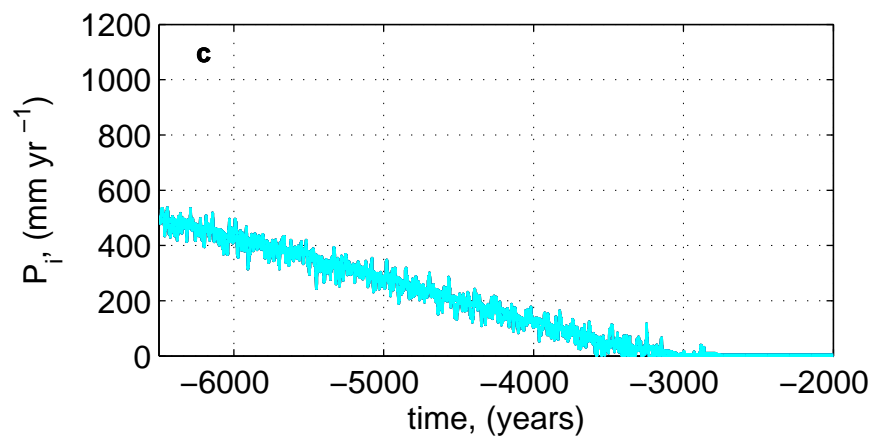

Four AHP plant types interacting together with climate

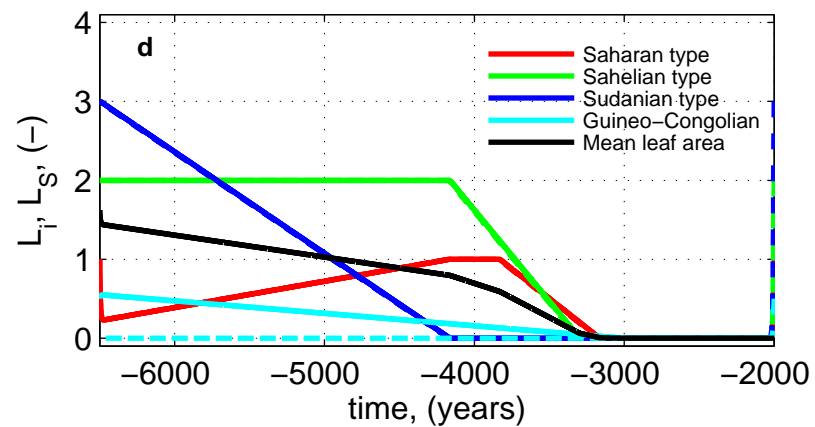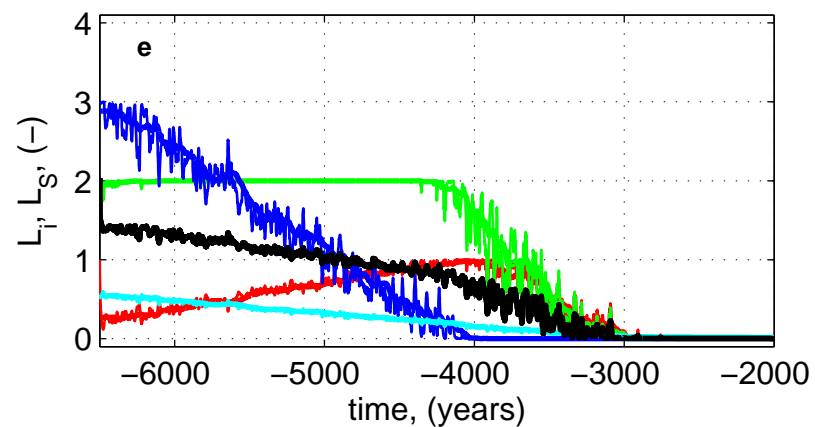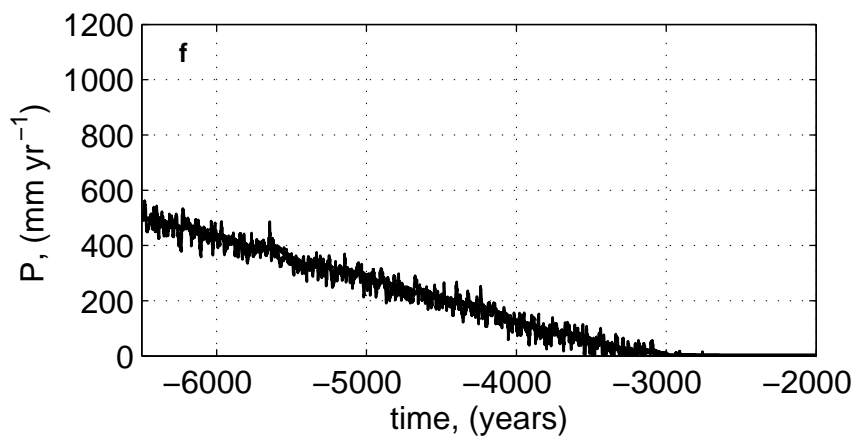

Supplement: Supplementary file 8 [file cp-11-1361-2015-supplement.zip]
