# Supplementary figures and images for: Palaeo plant diversity in subtropical Africa – ecological assessment of a conceptual model of climate–vegetation interaction
Source: Copernicus journal article supplement (doi:10.5194/cp-11-1361-2015), 2015-10-14

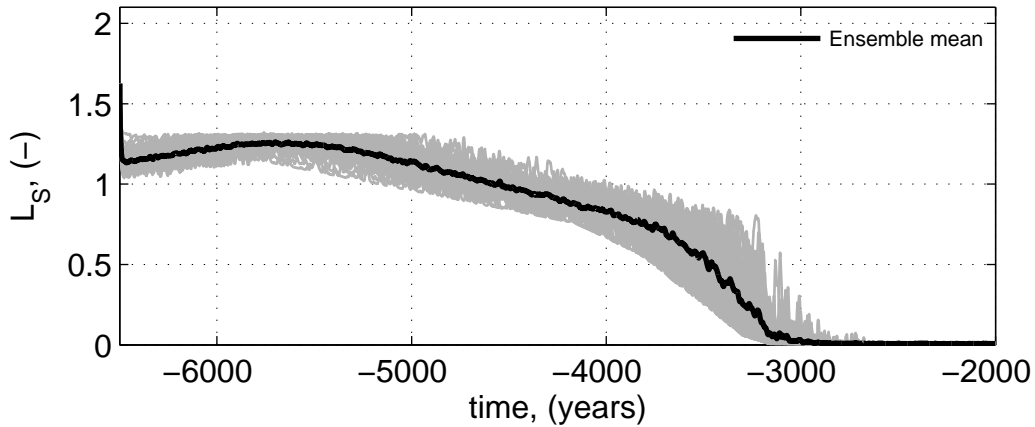

Supplement: Supplementary file 3 [file cp-11-1361-2015-supplement.zip]

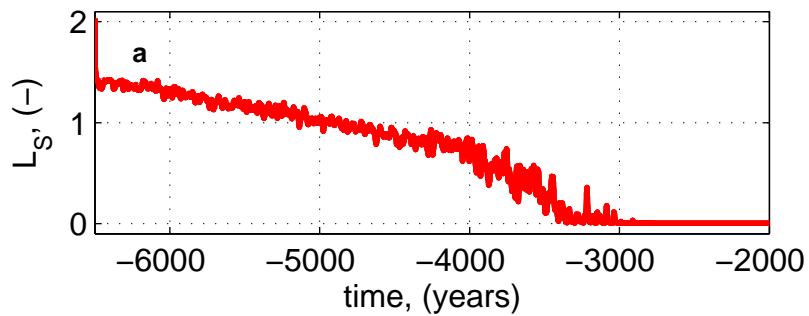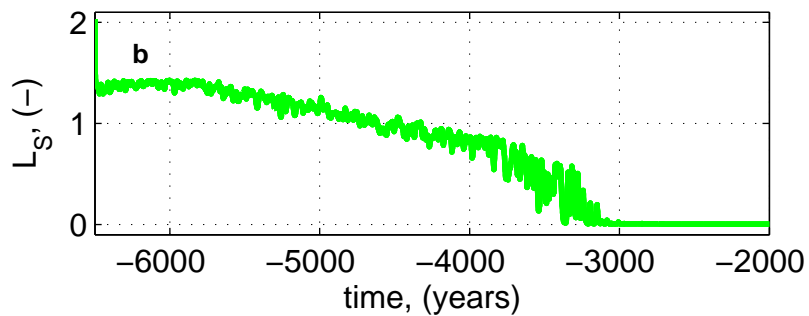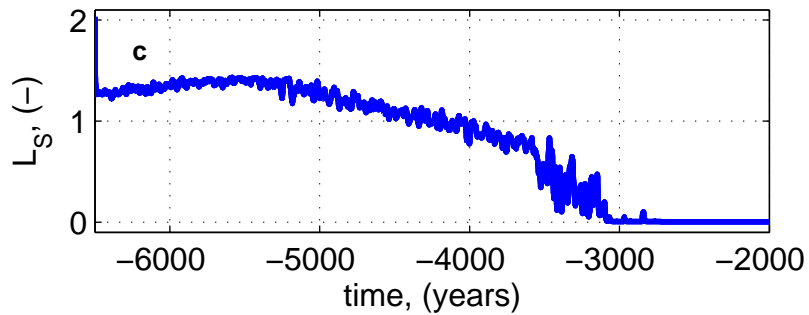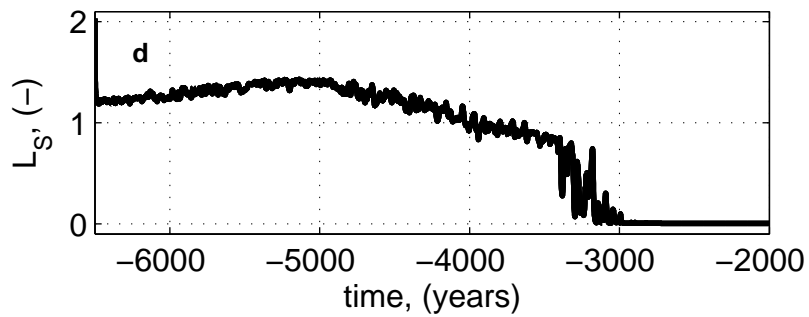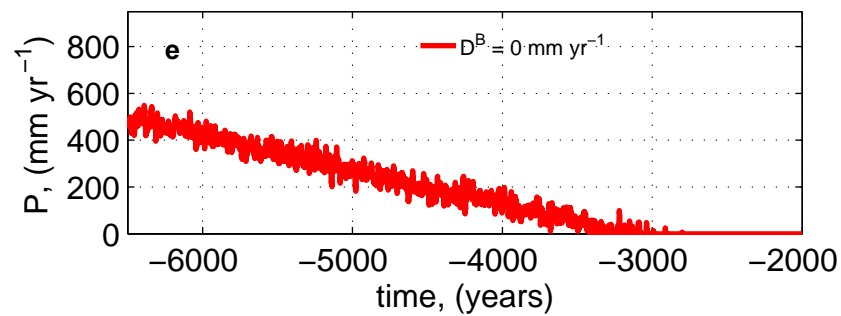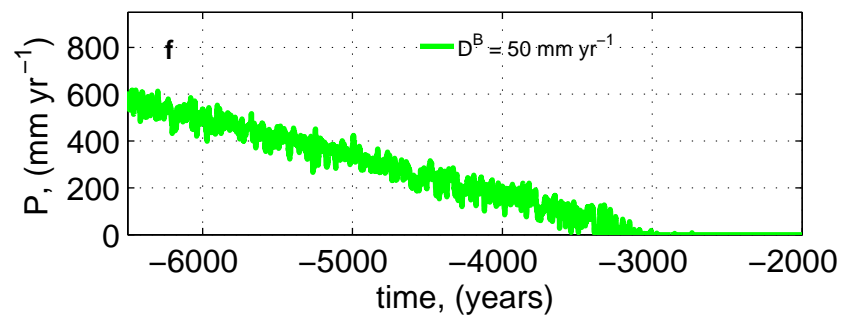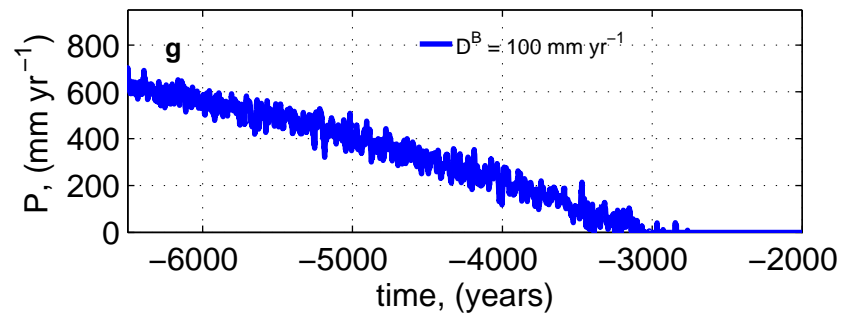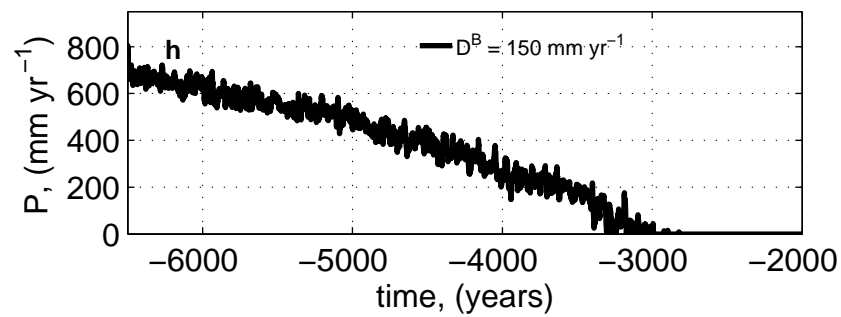

Supplement: Supplementary file 7 [file cp-11-1361-2015-supplement.zip]
